# Supplementary material for: RNA-mediated TILDA for improved cell capacity and enhanced detection of multiply-spliced HIV RNA
Source: Royal Society of Chemistry journal article supplement (doi:10.1039/c7ib00112f), 2017-01-01
Supplement: c7ib00112f1.pdf [file c7ib00112f1.pdf]

## Supplemental Figures

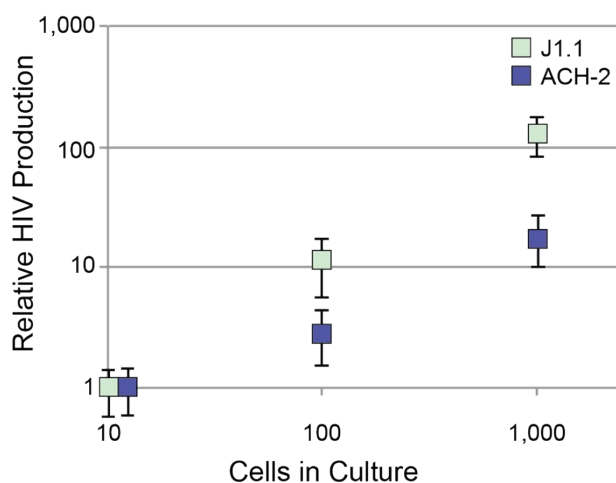

Supplemental Figure 1: Relative detection of produced HIV from cell-free conditioned media from 10 to 1,000 inputted HIV producing cell lines, J1.1 and ACH-2. Conditioned media was collected from each culture after 24-hours of culture and assayed for HIV-specific RNA sequences using quantitative RT-PCR. HIV-specific RNA sequences were isolated from culture media 24 hours after plating in both cell lines. All samples were performed in triplicate with error bars representing standard deviation.

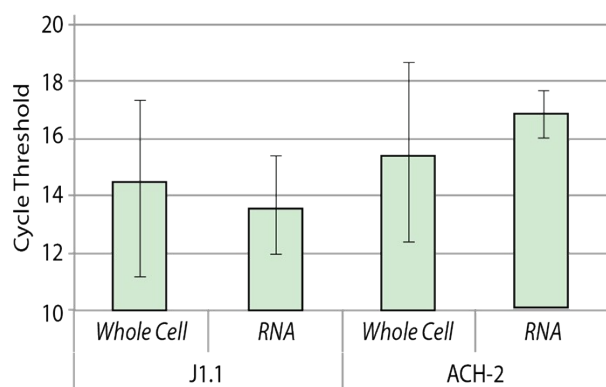

Supplemental Figure 2: Reported cycle threshold from detection of *tat/rev* mRNA using either a whole cell input or ESP-isolated RNA. TILDA amplification and detection was done using the published 4-minute elongation cycles. Samples consisted of approximately 10 cells. Bars represent replicate averages (n=4) while error bars represent standard deviation. For both cell types, no statistically significant difference was observed (t-test,  $p > 0.05$ ).

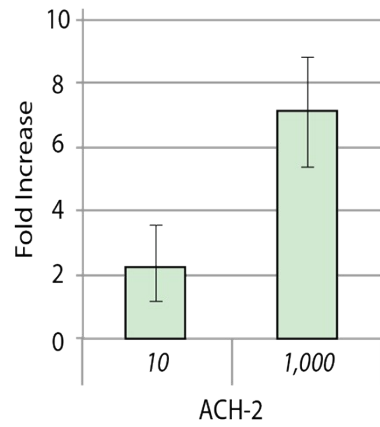

Supplemental Figure 3: Fold increase in HIV production (quantified by RT-PCR for HIV-specific RNA sequences isolated from cell-free conditioned media) following a 24-hour induction period with 5 ng/mL PMA.
